1 **Unfractionated heparin potently inhibits the binding of SARS-CoV-2**  
2 **spike protein to a human cell line**

3 Lynda J. Partridge<sup>1</sup>, Luke R. Green<sup>2\*</sup>, Peter N. Monk<sup>2</sup>

4 <sup>1</sup>Department of Molecular Biology and Biotechnology, The University of Sheffield,  
5 Sheffield, UK

6 <sup>2</sup>Department of Infection, Immunity and Cardiovascular Disease, The University of  
7 Sheffield, Sheffield, UK

8 \* Corresponding author

9 E-mail: [l.r.green@sheffield.ac.uk](mailto:l.r.green@sheffield.ac.uk) (LRG)

## 10 **Abstract**

11 The SARS-CoV-2 spike protein is known to bind to the receptor, ACE2, on the  
12 surface of target cells. The spike protein is processed by membrane proteases,  
13 including TMPRSS2, and is either internalised or fuses directly with the cell, leading  
14 to infection. We identified a human cell line that expresses both ACE2 and  
15 TMPRSS2, the RT4 urinary bladder transitional carcinoma, and used it to develop a  
16 proxy assay for viral interactions with host cells. A tagged recombinant form of the  
17 spike protein, containing both the S1 and S2 domains, binds strongly to RT4 cells as  
18 determined by flow cytometry. Binding is temperature dependent and increases  
19 sharply at 37°C, suggesting that processing of the spike protein is likely to be  
20 important in the interaction. As the spike protein has previously been shown to bind  
21 heparin, a soluble glycosaminoglycan, we used a flow cytometry assay to determine  
22 the effect of heparin on spike protein binding to RT4 cells. Unfractionated heparin  
23 inhibited spike protein binding with an IC<sub>50</sub> value of <0.05U/ml whereas two low  
24 molecular weight heparins were much less effective. This suggests that heparin,  
25 particularly unfractionated forms, could be considered to reduce clinical  
26 manifestations of COVID-19 by inhibiting continuing viral infection. Despite the  
27 sensitivity to heparin, we found no evidence that host cell glycosaminoglycans such  
28 as heparan and chondroitin sulphates play a major role in spike protein attachment.

29

## 30 Introduction

31 SARS-CoV-2, the causative agent of COVID-19, is thought to infect cells after  
32 binding with high affinity to a host cell receptor, ACE2 (1). The ACE2 binding domain  
33 is located in the spike protein that consists of two domains: S1, which has a high  
34 affinity receptor binding domain (RBD) and S2, which contains sequences necessary  
35 for fusion with the host cell. S1 and S2 are linked by a sequence that contains a  
36 putative furin cleavage site that is critical for the entry of the virus into human cells  
37 (2). A cell-surface host serine protease, TMPRSS2, is also thought to be involved in  
38 viral entry and is proposed to cleave S1 and S2, leading to activation of the fusion  
39 machinery (1). By analogy with SARS-CoV, it is expected that the virus can fuse at  
40 the cell surface or later, following internalisation (reviewed in (3)).

41 Paradoxically, ACE2 is expressed at quite low levels by most cell types (e.g. (4)) and  
42 by very few cell lines leading to suggestions that additional receptor sites must exist.  
43 Viruses, such as herpes simplex and the  $\beta$  coronavirus family are known to interact  
44 with host glycosaminoglycans (5). A growing body of evidence suggests that SARS-  
45 CoV-2 can bind the glycosaminoglycans, heparan sulphate and heparin, dependent  
46 on their level of sulphation (preprints (6-8)) and that heparin can inhibit SARS CoV 2  
47 entry in to Vero cells. Initial binding to heparan sulphates is thought to keep the spike  
48 protein within an 'open' conformation allowing for downstream binding and  
49 processing of ACE2 and TMPRSS2 respectively (7).

50 Here we present a new assay for viral attachment to host cells, using a human  
51 bladder epithelial cell line that expresses both ACE2 and TMPRSS2. The intact viral  
52 spike protein, but not the isolated S1 domain, exhibit a temperature dependent  
53 binding activity that allows rapid detection by flow cytometry. We have used this

54 assay to confirm that heparin can inhibit viral infection but that heparan sulphates  
55 alone might not constitute an additional viral attachment mechanism.

56

## 57 **Materials and Methods**

### 58 **Materials**

59 Surfen, a glycosaminoglycan antagonist (S6951-5mg, Sigma) was stored as a 5mM  
60 solution in DMSO. Unfractionated heparin (Leo, 1000U/ml), dalteparin (25000IU/ml)  
61 and enoxaparin (10000IU/ml) were obtained from the Royal Hallamshire Hospital  
62 Pharmacy, Sheffield, UK.

### 63 **Cell culture**

64 The RT4 cell line was obtained from (ATCC® HTB-2™, American Tissue Type  
65 Collection) and routinely cultured in McCoy's 5A medium (Thermo Fisher Scientific)  
66 supplemented with 10% foetal calf serum. The A549 cell line was obtained from the  
67 European Collection of Animal Cell Cultures (ECACC) and routinely cultured in  
68 DMEM supplemented with 10% foetal calf serum. Both cell lines were routinely sub-  
69 cultured by trypsinisation and maintained in sub-confluent cultures. For heparinase  
70 and chondroitinase treatment, RT4 cells were plated at  $1 \times 10^4$ /well in 6 well plates  
71 overnight, washed once in Hanks' Balanced Salt Solution (HBSS) containing divalent  
72 cations and then incubated for 3 hr with 0.5U/ml heparinase I/III (Merck) or 0.25U/ml  
73 chondroitinase (Merck) diluted in McCoy's 5A medium without serum. After washing  
74 with HBSS, the cells were harvested by brief trypsinisation and used in the spike  
75 protein binding assay.

## 76 **Spike protein binding assay**

77 Cells were harvested by brief trypsinisation and added to wells of a 96-well U bottom  
78 plate. After centrifugation at 300xg for 3 min and washing with HBSS containing  
79 divalent cations and 0.1% bovine serum albumin (BSA) (assay buffer, AB), cells were  
80 incubated with potential inhibitors in 50µl AB for 30 min at 37°C. The supernatant  
81 was removed following centrifugation and 25µl of AB containing S1-Fc (Stratech UK)  
82 or S1S2-His6 protein (Stratech UK) added before incubation at 4, 21 or 37°C for 60  
83 min. Cells were washed once and then incubated with the appropriate fluorescently  
84 labelled secondary antibody (anti-mouse Ig-FITC, Sigma; or anti-His6 HIS.H8  
85 DyLight 488, Invitrogen) for 30 min at 21°C. Cells were finally resuspended in 50µl  
86 AB containing propidium iodide and cell-associated fluorescence measured using a  
87 Guava 2L-6HT flow cytometer. Live cells were gated as a propidium iodide negative  
88 population and the median fluorescence (MFI) recorded. MFI was calculated after  
89 subtraction of cell-associated fluorescence of the secondary antibody alone. Where  
90 stated, the data were normalised to the untreated control cells.

## 91 **Determination of spike protein binding to ACE2 by ELISA**

92 ELISA plate wells (Maxisorb, Nunc) were coated with 1µg/ml recombinant human  
93 ACE2 (Biotechne) in coating buffer (0.05M sodium bicarbonate buffer, pH 9.6)  
94 overnight at 4°C. Following removal of excess ACE2, wells were washed twice with  
95 PBS 0.05% Tween, blocked with PBS 0.05% Tween 0.2% BSA for 2 hr at 37 °C and  
96 washed three times as previously. Various concentration of His-tagged spike  
97 proteins in blocking buffer (or blocking buffer control) were added to the wells  
98 (50µl/well) and incubated at 37 °C for 2 hr. Wells were washed three times as above  
99 then incubated at room temperature with 50µl/well biotin-labelled rabbit monoclonal

100 anti-His6 (Thermo Fisher Scientific) diluted to 1/1000 in blocking buffer for 1 hr,  
101 washed 3 times and incubated for 30 min with 50µl/well streptavidin-HRP (Pierce)  
102 diluted 1/200 in blocking buffer. After washing 3 times with PBS 0.05% Tween and  
103 twice with dH<sub>2</sub>O, 50µl per well TMB substrate solution (Novex) was added followed  
104 by 50µl 1M HCl to quench the reaction. Absorbance was measured at OD<sub>450nm</sub>.

105

## 106 **Results**

### 107 **Selection of a cell line for viral attachment studies**

108 The Protein Atlas database has information on mRNA expression in a wide variety of  
109 human cell lines (<https://www.proteinatlas.org>; (9)). Although HaCaT skin  
110 keratinocytes have the highest ACE2 expression, they do not express TMPRSS2  
111 (Table 1). The Caco2 colorectal adenocarcinoma cell line expresses no ACE2 mRNA  
112 but quite high levels of TMPRSS2; this cell line has been used in several infection  
113 studies of SARS-CoV and SARS-CoV-2 (10). The urinary bladder epithelial  
114 transitional-cell carcinoma cell line RT4 (11), expresses low levels of ACE2 but very  
115 high levels of TMPRSS2, making this cell line a suitable choice for the study of viral  
116 attachment. Of note, RT4 also expresses ADAM17, a metalloprotease known to be  
117 involved in the processing of ACE2, and CD9, an adaptor protein that controls  
118 ADAM17 trafficking and activity. Finally, RT4 cells also express rhomboid-like 2, a  
119 protease known to associate with ADAM17. In contrast, the human lung  
120 adenocarcinoma alveolar basal epithelial cell line A549 expresses neither ACE2 or  
121 TMPRSS2, perhaps explaining why this cell line does not support infection by SARS-  
122 CoV-2 (12).

123 **Table 1. Normalised mRNA expression values for ACE2 and potentially**  
124 **associated membrane proteins in several cell lines.**

|                | <b>RT4</b> | <b>A549</b> | <b>Caco2</b> | <b>HaCaT</b> |
|----------------|------------|-------------|--------------|--------------|
| <b>ACE2</b>    | 2.40       | 0.00        | 0.00         | 4.10         |
| <b>TMPRSS2</b> | 35.2       | 0.00        | 14.6         | 0.00         |
| <b>ADAM17</b>  | 12.9       | 12.7        | 11.2         | 14.2         |
| <b>RHBDL2</b>  | 6.00       | 18.8        | 5.50         | 13.9         |
| <b>CD9</b>     | 94.7       | 14.9        | 10.9         | 74.5         |

125 Normalised mRNA expression values are provided from the Protein Atlas database  
126 (<https://www.proteinatlas.org>).

127

### 128 **Expression of ACE2 and ADAM17 at the surface of RT4 cells**

129 We used flow cytometry to determine the expression of several membrane proteins  
130 on RT4 and A549 cells. ACE2 was detected only on the surface of RT4 cells,  
131 whereas both cell lines expressed ADAM17 (Fig 1).

132

133 **Figure 1. Expression of ACE2 on the surface of RT4 but not A549 cells.** RT4  
134 and A549 cells were stained with goat anti-human ACE2 or mouse anti-human  
135 ADAM17 antibodies and the appropriate fluorescent secondary antibodies. Panel A  
136 shows the histograms for RT4 and A549 surface ACE2 and ADAM 17 expression  
137 (black line) and the secondary-antibody only control (grey). Panel B shows the  
138 relative expression on the two cells lines. MFI was calculated as a percentage of the  
139 secondary antibody-only controls.

140

### 141 **Binding of SARS-CoV-2 spike proteins to RT4 and A549 cells**

142 To detect spike protein binding, we used recombinant S1 and S1S2, tagged with  
143 mouse Fc and His6, respectively. Following published binding studies for S1 (13),  
144 binding was performed initially at 21°C, using fluorescently labelled secondary anti-  
145 tag antibodies to stain cells for flow cytometry. Only a very low level of S1 binding to  
146 RT4 cells was detected, and S1 binding to A549 cells was undetectable (S1 Fig). In  
147 contrast, S1S2 protein bound strongly to subsets of both RT4 and A549 cells, with a  
148 higher percentage of RT4 cells positive when compared to A549 cells (Fig 2A).  
149 Binding was detectable from 100nM S1S2 (Fig 2B) but was not saturated at 330nM,  
150 the highest concentration that could be used due to limited availability of the S1S2  
151 protein.

152

153 **Figure 2. Recombinant S1S2 SARS-CoV-2 spike protein binds to RT4 and A549**  
154 **cells at 21°C.** RT4 cells were incubated with His6-tagged S1S2 protein for 30 min at  
155 21°C and then with anti-His6 secondary antibody labelled with Dylight 488. Cell  
156 associated fluorescence was measured by flow cytometry. Panel A shows 330nM  
157 S1S2 binding (red line) compared to secondary-only control (grey). The histograms  
158 are representative of two separate experiments conducted in duplicate. Panel B  
159 shows binding to RT4 cells measured as the number of cells more positive than the  
160 secondary antibody alone expressed as a percentage of the secondary-only controls  
161 (NA) for S1S2 from a single experiment conducted in duplicate.

162

163 To determine if the levels of detectable S1S2 binding to RT4 cells were being  
164 affected by internalisation of the tagged protein, we performed binding experiments  
165 at both 4°C, which should largely inhibit internalisation, and at 37°C, which should be



166 permissive for internalisation. Surprisingly, the binding of S1S2 at 37°C was much  
167 stronger than at 4°C or 21°C (Fig 3), with all cells stained. In contrast, S1 protein  
168 binding was undetectable at 4°C and only slightly elevated at 37°C (Fig 3). We were  
169 unable to determine the affinity of the interaction due to a limited availability of  
170 recombinant S1S2, but binding was still increasing even at 330nM (Fig 4A),  
171 suggesting a relatively low affinity interaction. This is in contrast to published reports  
172 of the affinity of S1 for HEK cells overexpressing human ACE2 (~10nM) (13). Binding  
173 to A549 cells at 37°C was much lower than to RT4 cells (Fig 4A, B) at all  
174 concentrations tested although the cytometry histogram indicated that all cells could  
175 bind some S1S2. This suggests that the binding at 37°C may be at least partly  
176 dependent on ACE2 and/or TMPRSS2 expression. S1S2 must be internalised only  
177 slowly, if at all, over the time course of the assay at 37°C. However, the temperature  
178 dependency suggests that S1S2 might undergo a conformational change, perhaps  
179 as a result of proteolytic processing at the cell surface.

180

181 **Figure 3. S1S2 binding to RT4 cells dramatically increases at 37°C.** RT4 cells  
182 were incubated with 330nM S1-Fc (A, C) or 330nM S1S2-His6 protein (C, D) for 60  
183 min at either 4°C (A, B) or 37°C (C, D), before staining with anti-mouse Ig labelled  
184 with FITC or anti-His6 secondary antibody labelled with Dylight 488 for 30 min at  
185 21°C. Cell-associated fluorescence was measured using flow cytometry. Grey shows  
186 secondary-only control.

187 **Figure 4. WT S1S2 binds more strongly to RT4 than to A549 cells.** Panel A  
188 shows a dose-response curve for S1S2 binding to RT4 and A549 cells at 37°C, for  
189 S1S2. The data are the means from a single experiment conducted in duplicate.

190 Panel B shows representative histograms of 100nM S1S2 binding to RT4 and A549  
191 cells at 37°C (black lines), compared to secondary antibody alone (grey).

192

193

#### 194 **Unfractionated heparin inhibits S1S2 binding to RT4 cells**

195 Having developed a novel assay that should mimic some aspects of SARS-CoV-2  
196 infection, we used it to test potential inhibitors. Heparin has been reported to bind  
197 directly to S1 and to interfere with SARS-CoV-2 infection (8) and so we tested the  
198 effects of pre-incubating RT4 cells with heparin on the S1S2 binding at 37°C.  
199 Unfractionated heparin (UFH) at 10U/ml inhibited 80% of 330nM S1S2 binding to the  
200 cells (Fig 5A) and reached significance compared to untreated controls (Fig 5B).  
201 Using 100nM S1S2, the inhibition by UFH was complete with an  $IC_{50}$  of 0.033U/ml  
202 (95% confidence interval 0.016-0.07) (Fig 6). This is far below the target prophylactic  
203 and therapeutic concentrations in serum, 0.1-0.4U/ml and 0.3-0.7U/ml, respectively  
204 (14, 15). In contrast, two low molecular weight heparins, dalteparin and enoxaparin,  
205 were both only partial inhibitors, and were less potent than UFH ( $IC_{50}$  values of 0.558  
206 and 0.072IU/ml, respectively). Typical prophylactic and therapeutic serum  
207 concentrations of LMWH are 0.2-0.5IU/ml 0.5-1.2IU/ml (16), suggesting that  
208 dalteparin may be used below the effective dose required for inhibition of viral  
209 infection if used prophylactically.

210

211 **Figure 5. Unfractionated heparin inhibits S1S2 binding to RT4 cells.** RT4 cells  
212 were pre-treated with 10U/ml unfractionated heparin for 30 min at 37°C before the  
213 addition of 330nM S1S2. After a further 60 min at 37°C, cells were washed and

214 fluorescent secondary anti-His6 added for a further 30 min at 21°C. Cell-associated  
215 fluorescence was measured by flow cytometry. Panel A shows a representative  
216 histogram with S1S2 binding (blue line), S1S2 binding after heparin treatment (black  
217 line) and secondary antibody only (grey). Panel B shows the effects of 10U/ml  
218 heparin pre-treatment on 330nM S2S2 binding, as a percentage of the S1S2 binding  
219 to untreated (NA) control cells. Data are from four separate experiments in duplicate  
220  $\pm$ SEM. Significance to NA, \*\*  $p < 0.01$ , one sample t test.

221 **Figure 6. Concentration dependent inhibition of S1S2 binding by**  
222 **unfractionated heparin and low molecular weight heparins, dalteparin and**  
223 **enoxaparin.** RT4 cells were pre-incubated with the stated concentrations of  
224 unfractionated heparin, enoxaparin and dalteparin for 30 min at 37°C, then with  
225 100nM S1S2 for a further 60 min at 37°C. After a further 60 min at 37°C, cells were  
226 washed and fluorescent secondary anti-His6 added for a further 30 min at 21°C.  
227 Cell-associated fluorescence was measured by flow cytometry and are shown as a  
228 percentage of the S1S2 binding to untreated control cells. Data are the means  $\pm$  SD  
229 of 2-3 experiments performed in duplicate.

230

### 231 **The inhibitory activity of heparin is specific to S1S2 binding to cells**

232 ACE2 binding by both S1 and S1S2 proteins was detected in ELISA using  
233 immobilised ACE2, with  $EC_{50}$  values of  $\sim 20$ nM (S2 Fig A), similar to published data  
234 (13). The presence of 10U/ml UFH did not interfere with the recognition of ACE2 (S2  
235 Fig B). The effect of UFH was also not caused by blockade of the His6 tag-antibody  
236 interaction (S3 Fig C), which was not affected in ELISA by concentrations of UFH of  
237 500U/ml.

## 238 **No evidence for S1S2 binding to heparan sulphates on RT4 cells**

239 An interaction with heparin suggests that S1S2 protein may also interact with  
240 heparan sulphate glycosaminoglycans at the host cell surface, as has previously  
241 been shown for SARS-CoV-1 (17) and more recently with SARS-CoV-2 (7). RT4  
242 cells were treated for 3 hours with 0.5U/ml of a heparanase I and III blend, or  
243 0.25U/ml chondroitinase before S1S2 binding was tested. Neither treatment resulted  
244 in a significant reduction in S1S2 binding (Fig 7A). Surfen, a glycosaminoglycan  
245 antagonist, has been shown to completely inhibit FGF2 binding to heparan sulphates  
246 on CHO cells at concentrations between 5-20 $\mu$ M (18). Treatment of RT4 cells with  
247 16.5 $\mu$ M-0.45 $\mu$ M surfen, resulted in only a ~40% reduction in S1S2 binding (Fig 7B).  
248 These data suggest that heparan sulphates play only a minor role in spike protein  
249 attachment to host cells.

250

251 **Figure 7. Removal or blockade of heparan sulphates has only minor effects on**  
252 **S1S2 binding.** RT4 cells were pre-treated with heparinase I/III or chondroitinase  
253 (Panel A) for 3 hrs or surfen for 30 min (Panel B) at 37°C before incubation with  
254 100nM S1S2 for a further 60 min at 37°C. After a further 60 min at 37°C, cells were  
255 washed and fluorescent secondary anti-His6 added for a further 30 min at 21°C.  
256 Cell-associated fluorescence was measured by flow cytometry and are shown as a  
257 percentage of the S1S2 binding to untreated control cells. Panel A, data are the  
258 means  $\pm$  SD from two separate experiments performed in duplicate. Panel B, data  
259 are the means  $\pm$  SD of four separate experiments conducted in duplicate.

260

## 261 Discussion

262 We have demonstrated that intact recombinant S1S2 spike protein but not the S1  
263 domain from SARS-CoV-2 can bind strongly to a human cell line that expresses  
264 ACE2 and TMPRSS2. We have developed this as an assay to test potential  
265 inhibitors of viral infection and shown that UFH and two low molecular weight  
266 heparins (LMWH) in use clinically can inhibit S1S2 binding. The same activity profile  
267 for UFH and one LMWH (enoxaparin) has been demonstrated in SARS-CoV-2  
268 infection of Vero cells (8). These authors also showed that heparin could interact  
269 with recombinant S1 RBD and cause conformational changes, leading to the  
270 suggestion that SARS-CoV-2 might use host heparan sulphates as an additional  
271 attachment site during infection. Although our data supports the inhibitory activity of  
272 UFH, it does not support the conjecture that heparan sulphates are essential for viral  
273 infection. Studies have also suggested the importance of differing glycan sulphation  
274 states in different tissues as an explanation for viral tropism. Recently, SARS-CoV-2  
275 spike protein S1 has been shown to bind heparan sulphates with varying degrees of  
276 sulphation with differing affinities; chain length and 6-O-sulphation were particularly  
277 important (7). Furthermore, heparin could also be inhibiting host proteases that are  
278 necessary to process the spike protein, as previously hypothesised (19).

279 LMWH are smaller (<8kDa) than UFH, which is a mix of polysaccharide chain  
280 lengths from ~5-40kDa, and have more predictable pharmacokinetics (20). LMWH  
281 are commonly used both prophylactically and therapeutically in COVID-19 patients  
282 and have been reported to improve patient outcome (21)). Our work and the work of  
283 Mycroft-West et al (8) suggests that thought be given to the earlier use of heparin  
284 when viral infection is still an important driver of disease severity. The use of UFH

285 rather than LMWH should also be considered, although we note that administration  
286 and the safety profile of UFH might preclude this in some cases (22).

287 In conclusion, we have developed a simple flow cytometric assay for SARS-CoV-2  
288 spike protein binding to human cells, confirming an earlier finding concerning  
289 inhibition of whole live virus binding to African green monkey cells using heparin. Our  
290 new assay could be a useful first screen for novel inhibitors of coronavirus infection.

291

## 292 **Acknowledgements**

293 The authors would like to Dr Stephane Mesnage for flow cytometry and the staff of  
294 the Molecular Biology and Biotechnology Department for access to laboratory space.

## 295 **References**

- 296 1. Hoffmann M, Kleine-Weber H, Schroeder S, Kruger N, Herrler T, Erichsen S, et al.  
297 SARS-CoV-2 Cell Entry Depends on ACE2 and TMPRSS2 and Is Blocked by a Clinically  
298 Proven Protease Inhibitor. *Cell*. 2020;181(2):271-80 e8.
- 299 2. Hoffmann M, Kleine-Weber H, Pohlmann S. A Multibasic Cleavage Site in the Spike  
300 Protein of SARS-CoV-2 Is Essential for Infection of Human Lung Cells. *Mol Cell*. 2020.
- 301 3. Hofmann H, Pohlmann S. Cellular entry of the SARS coronavirus. *Trends Microbiol*.  
302 2004;12(10):466-72.
- 303 4. Li MY, Li L, Zhang Y, Wang XS. Expression of the SARS-CoV-2 cell receptor gene  
304 ACE2 in a wide variety of human tissues. *Infect Dis Poverty*. 2020;9(1):45.
- 305 5. O'Donnell CD, Shukla D. The Importance of Heparan Sulfate in Herpesvirus  
306 Infection. *Viol Sin*. 2008;23(6):383-93.
- 307 6. Liu L, Chopra P, Li X, Wolfert M, Tompkins MS, Boons G-J. SARS-CoV-2 spike  
308 protein binds heparan sulfate in a length- and sequence-dependent manner. *bioRxiv*. 2020.

- 309 7. Hao W, Ma B, Li Z, Wang X, Gao X, Li Y, et al. Binding of the SARS-CoV-2 Spike  
310 Protein to Glycans. *BioRxiv*. 2020.
- 311 8. Mycroft-West CJ, Su D, Pagani I, Rudd TR, Elli S, FGuimond SE, et al. Heparin  
312 inhibits cellular invasion by SARS-CoV-2: structural dependence of the interaction of the  
313 surface protein (spike) S1 receptor binding domain with heparin. *BioRxiv*. 2020.
- 314 9. Uhlen M, Zhang C, Lee S, Sjostedt E, Fagerberg L, Bidkhorji G, et al. A pathology  
315 atlas of the human cancer transcriptome. *Science*. 2017;357(6352).
- 316 10. Kim JM, Chung YS, Jo HJ, Lee NJ, Kim MS, Woo SH, et al. Identification of  
317 Coronavirus Isolated from a Patient in Korea with COVID-19. *Osong Public Health Res*  
318 *Perspect*. 2020;11(1):3-7.
- 319 11. O'Toole C, Perlmann P, Unsgaard B, Almgard LE, Johansson B, Moberger G, et al.  
320 Cellular immunity to human urinary bladder carcinoma. II. Effect of surgery and  
321 preoperative irradiation. *Int J Cancer*. 1972;10(1):92-8.
- 322 12. Matsuyama S, Nao N, Shirato K, Kawase M, Saito S, Takayama I, et al. Enhanced  
323 isolation of SARS-CoV-2 by TMPRSS2-expressing cells. *Proc Natl Acad Sci U S A*.  
324 2020;117(13):7001-3.
- 325 13. Tai W, Zhang X, He Y, Jiang S, Du L. Identification of SARS-CoV RBD-targeting  
326 monoclonal antibodies with cross-reactive or neutralizing activity against SARS-CoV-2.  
327 *Antiviral Res*. 2020:104820.
- 328 14. Hirsh J, Warkentin TE, Shaughnessy SG, Anand SS, Halperin JL, Raschke R, et al.  
329 Heparin and low-molecular-weight heparin: mechanisms of action, pharmacokinetics,  
330 dosing, monitoring, efficacy, and safety. *Chest*. 2001;119(1 Suppl):64S-94S.
- 331 15. Lehman CM, Frank EL. Laboratory Monitoring of Heparin Therapy: Partial  
332 Thromboplastin Time or Anti-Xa Assay? *Labmedicine*. 2009;40(1):47-51.
- 333 16. Weitz JI. Low-molecular-weight heparins. *New Engl J Med*. 1997;337(10):688-98.
- 334 17. Lang J, Yang N, Deng J, Liu K, Yang P, Zhang G, et al. Inhibition of SARS  
335 pseudovirus cell entry by lactoferrin binding to heparan sulfate proteoglycans. *PLoS One*.  
336 2011;6(8):e23710.

- 337 18. Schuksz M, Fuster MM, Brown JR, Crawford BE, Ditto DP, Lawrence R, et al. Surfen,  
338 a small molecule antagonist of heparan sulfate. Proc Natl Acad Sci U S A.  
339 2008;105(35):13075-80.
- 340 19. Belen-Apak FB, Sarialioglu F. The old but new: Can unfractionated heparin and low  
341 molecular weight heparins inhibit proteolytic activation and cellular internalization of SARS-  
342 CoV2 by inhibition of host cell proteases? Med Hypotheses. 2020;142:109743.
- 343 20. Samama M, Bernard P, Bonnardot JP, Combe-Tamzali S, Lanson Y, Tissot E. Low  
344 molecular weight heparin compared with unfractionated heparin in prevention of  
345 postoperative thrombosis. Br J Surg. 1988;75(2):128-31.
- 346 21. Tang N, Bai H, Chen X, Gong J, Li D, Sun Z. Anticoagulant treatment is associated  
347 with decreased mortality in severe coronavirus disease 2019 patients with coagulopathy. J  
348 Thromb Haemost. 2020;18(5):1094-9.
- 349 22. Junqueira DR, Perini E, Penholati RR, Carvalho MG. Unfractionated heparin versus  
350 low molecular weight heparin for avoiding heparin-induced thrombocytopenia in  
351 postoperative patients. Cochrane Database Syst Rev. 2012(9):CD007557.

352

## 353 **Supporting information**

354 **S1 Fig. S1-Fc binding to RT4 and A549 cells is very low.** RT4 or A549 cells were  
355 incubated with 330nM mouse Fc-tagged S1S2 protein for 30 min at 21°C and then  
356 with anti-mouse Ig secondary antibody labelled with FITC. Cell associated  
357 fluorescence was measured by flow cytometry. The histograms show S1 binding  
358 (black line) compared to secondary-only control (grey) and are representative of  
359 several separate experiments conducted in duplicate.

360 **S2 Fig. S1S2 binds to ACE2 in ELISA and binding is not inhibited by**  
361 **unfractionated heparin.** In panels A and C, recombinant human ACE2 was



362 immobilised on an ELISA plate. For C, 10U/ml of unfractionated heparin was added  
363 for 30 min at 37°C. Recombinant human S1S2 was incubated at the stated  
364 concentrations (A) or at 65nM (C) for 2 hrs before the addition of biotinylated anti-  
365 His6 antibody (S1S2) or an anti-mouse Ig antibody labelled directly with horseradish  
366 peroxidase (S1). Bound S1S2 was visualised using streptavidin-horseradish  
367 peroxidase and developed using TMB. In panel B, two His6-tagged proteins (human  
368 C5a and SARS-CoV-2 S1 RBD) were immobilised on the plate before visualisation  
369 using streptavidin-horseradish peroxidase and developed using TMB. The  
370 absorbance was measured at 450nm. Data are the results of single experiments  
371 performed in duplicate (A, B) or in triplicate (C).

**A**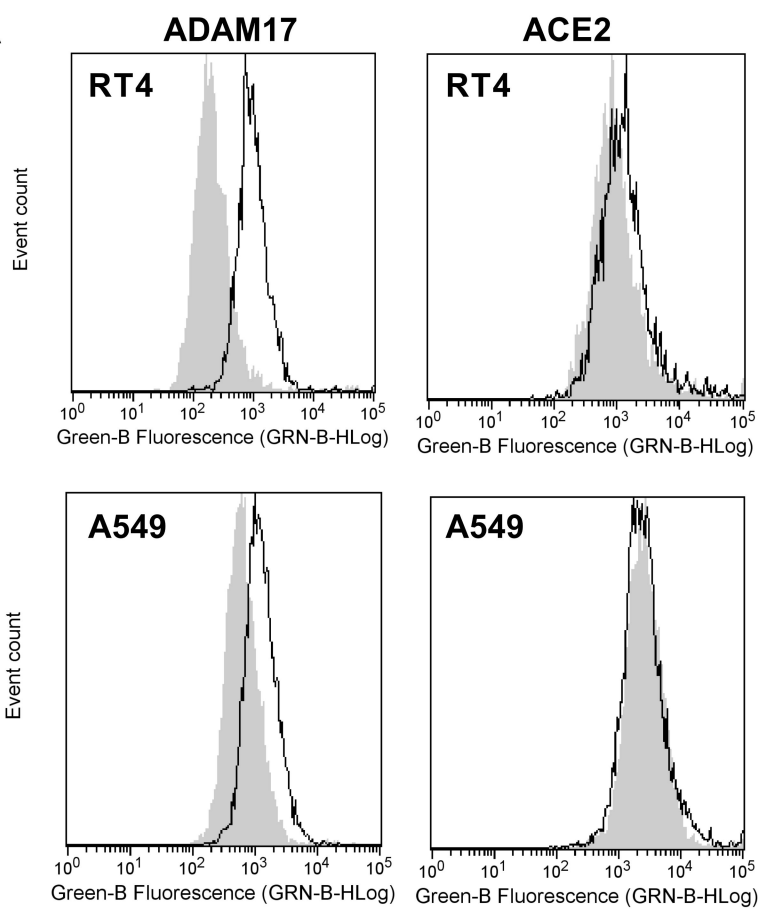**B**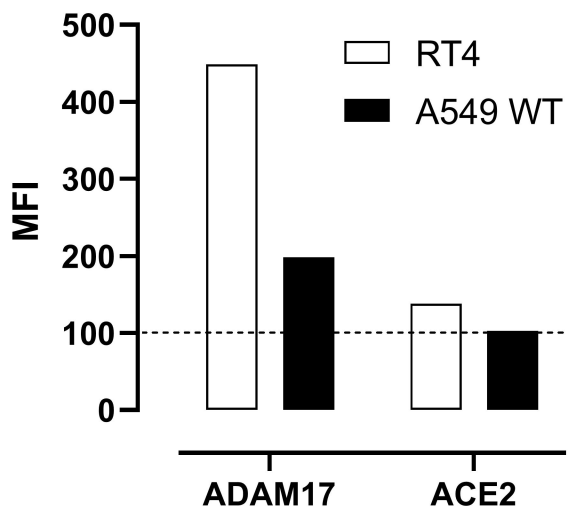

**A**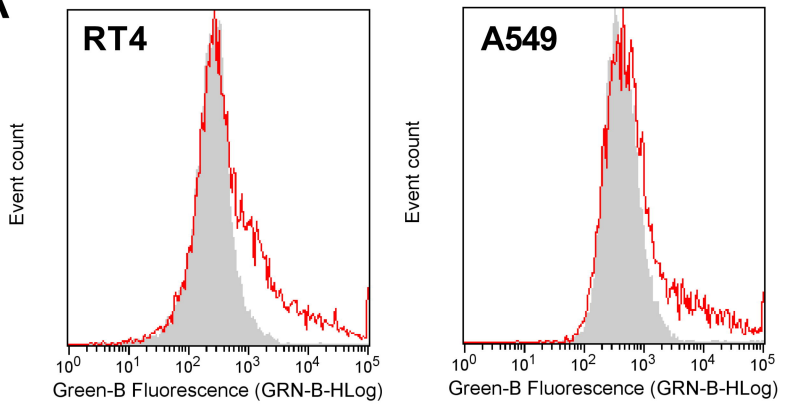**B**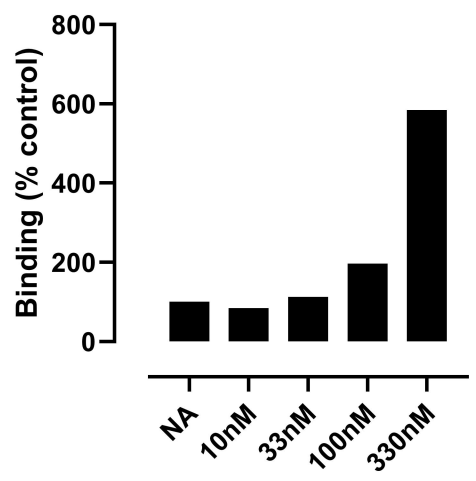

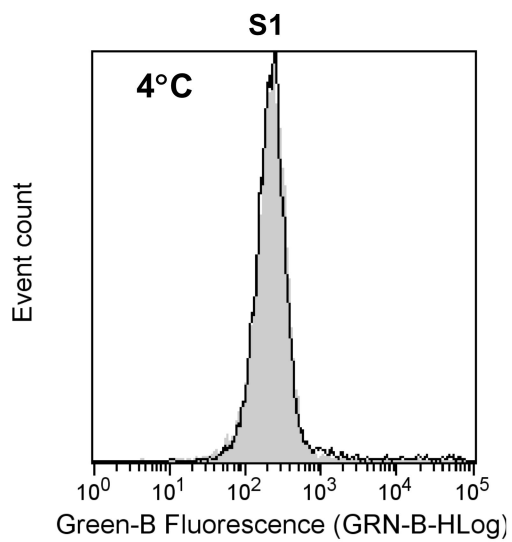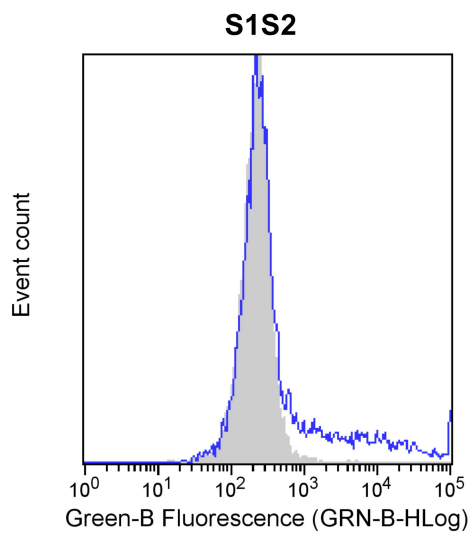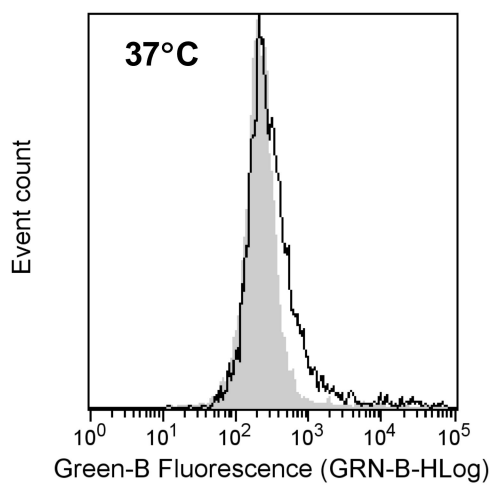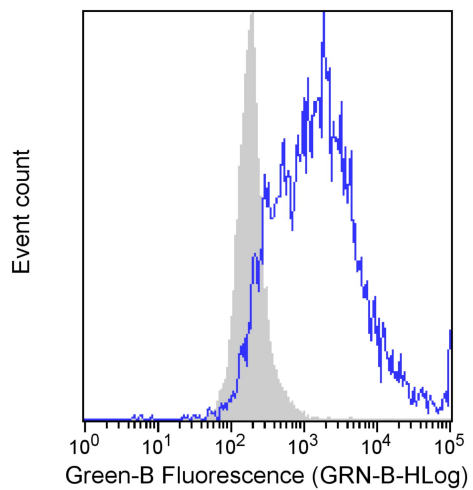

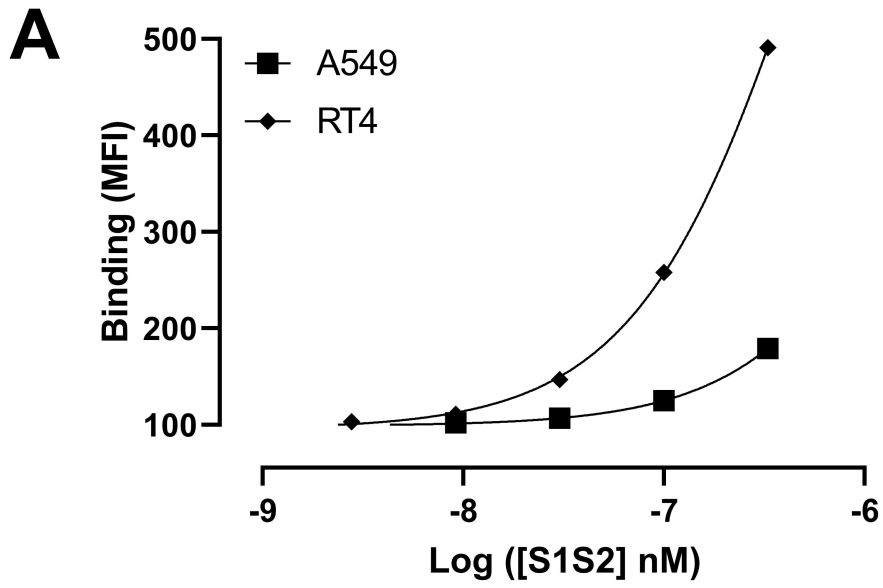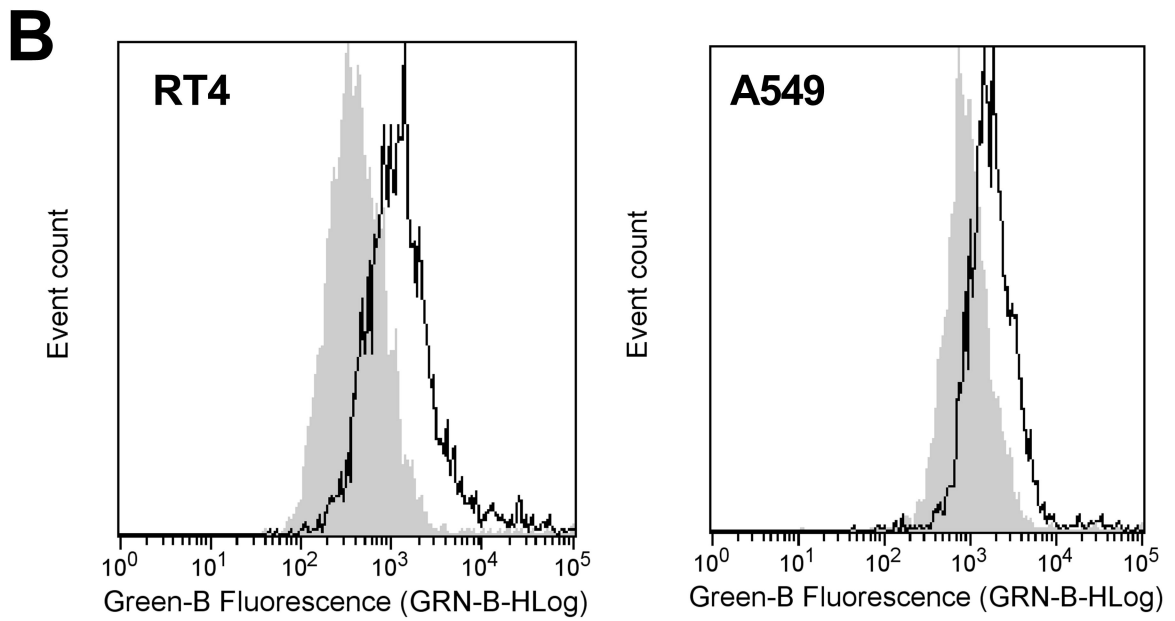

**A**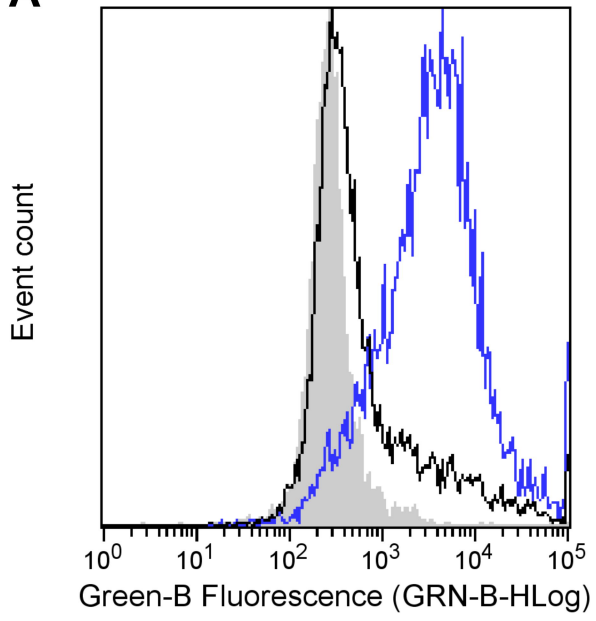**B**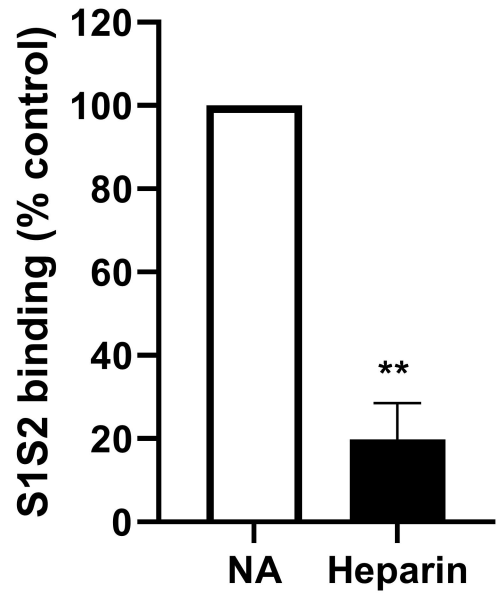

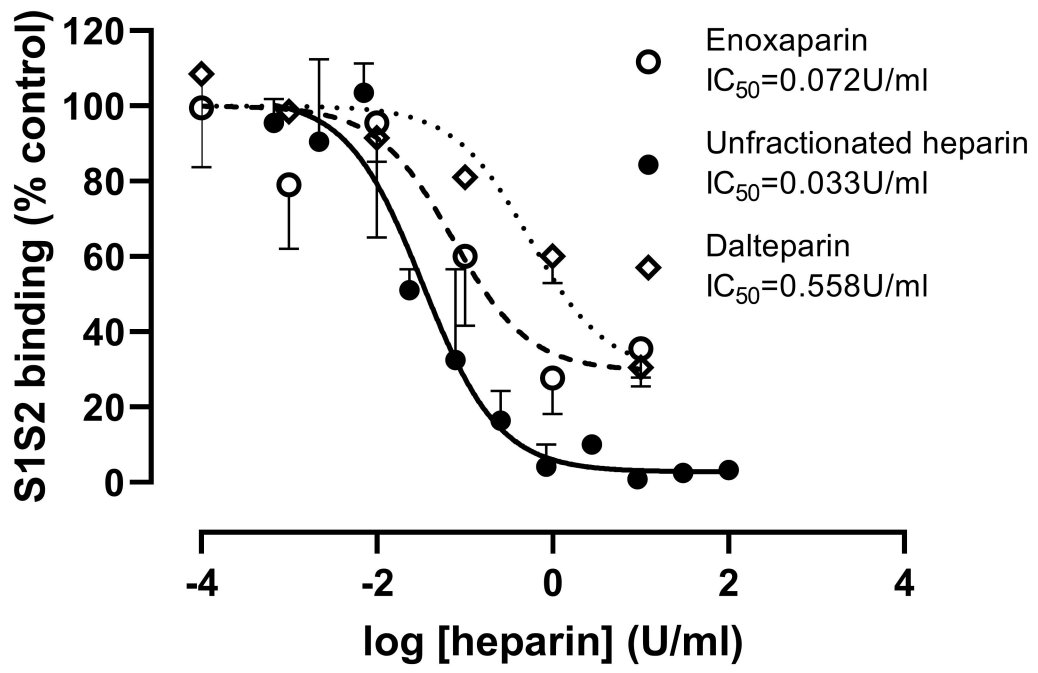

**A**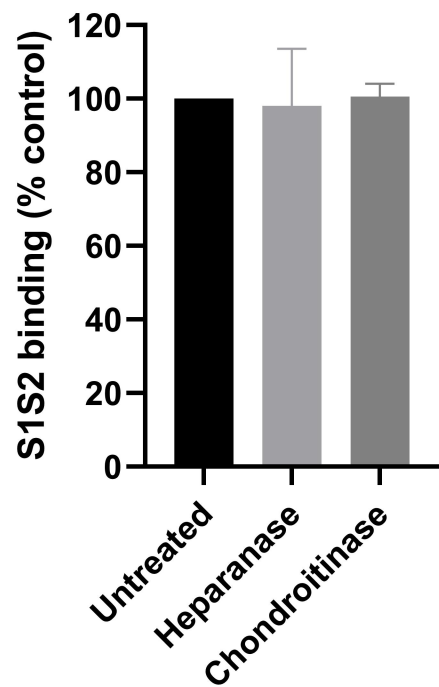**B**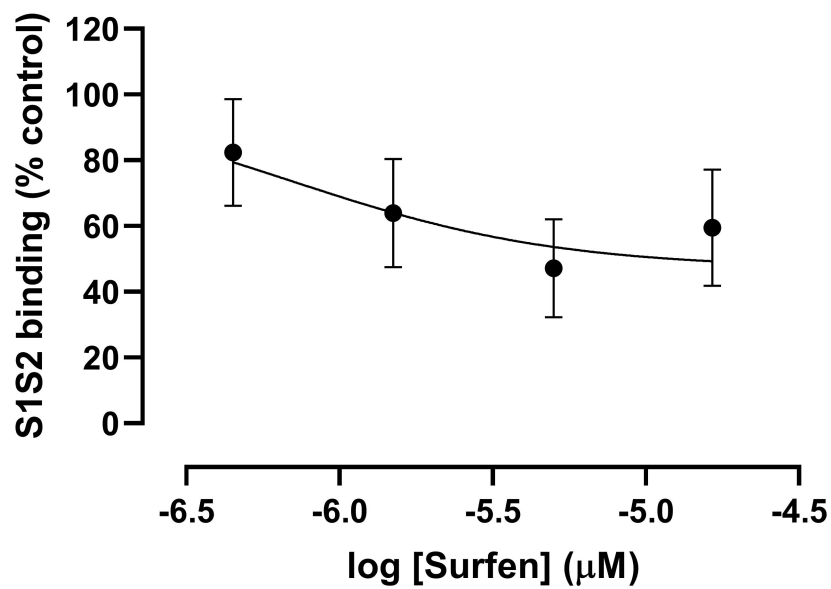

Source: https://www.biorxiv.org/content/10.1101/2020.05.21.107870v1.full.pdf
